# Supplementary material for: Amyloid and tau accumulate across distinct spatial networks and are differentially associated with brain connectivity
Source: eLife. 2019 Dec 9;8:e50830. doi: 10.7554/eLife.50830 (PMC6938400; doi:10.7554/eLife.50830)
Supplement: Figure 4—source data 1. — Values for the tau networks and fractional anisotropy of white matter tracts that were significantly correlated with each other, after regressing out the effects of age, sex and presence of cognitive impairment. [file elife-50830-fig4-data1.xlsx]

## Sheet: Data_Fig3_Fig4
ID	Diagnosis	IC2_Tau_Left_Inferior_Occipital	IC3_Tau_Temporal	IC4_Tau_Insular	IC5_Tau_Superior_Frontal	IC6_Tau_Posterior_Medial	IC7_Tau_Fronto_Parietal	IC10_Tau_Right_Inferior_Occipital	IC11_Tau_Middle_Frontal	FA_Cingulum_Hippocampal_Tract	FA_Inferior_Fronto_Occipital_Fasciculus	FA_Inferior_Longitudinal_Fasciculus	FA_Superior_Longitudinal_Fasciculus	FA_Uncinate_Fasciculus
1	AD	1.52244	0.428616	-0.278247	-0.747711	-0.0105358	0.598487	0.495913	-0.443879	-0.0214121	0.626884	0.0326829	0.293356	1.06951
2	AD	1.23862	1.19725	1.84438	1.6452	1.42886	1.0132	1.74713	0.962661	-1.46703	-1.9419	-2.46219	-0.847912	-1.45527
3	AD	1.79745	1.0595	0.788405	0.00753663	0.440229	0.639499	1.16401	0.565371	-0.134443	0.763627	0.174765	0.338016	0.827765
4	CTR	-0.00361222	-0.43503	-0.117276	-0.494101	-0.0789278	-0.0569478	0.146064	-0.257975	0.119739	-0.906901	-1.46087	-1.71498	-0.797545
5	AD	0.99997	0.529611	1.26683	-0.70039	0.764492	1.19321	0.63461	0.209651	-0.968887	-1.33098	-1.74745	-1.28279	-0.26229
6	AD	-0.238893	-0.345681	-0.0892847	-0.108718	-0.367424	-0.540092	-0.0568781	-0.404206	0.871543	0.800794	0.388321	0.0376473	0.361379
7	AD	-1.41457	-1.10787	-0.836593	-1.19895	-0.489227	-1.38359	-1.28266	-0.50425	0.296915	-1.54335	-0.984701	-0.769784	-0.820567
8	AD	-1.42345	0.363382	-0.837206	-0.0381665	-0.510153	-0.814301	-1.47487	-0.123967	0.0141068	-0.543687	-0.403454	-0.440591	-1.93575
9	MCI	3.07603	0.410467	1.34138	-0.71764	2.33178	2.11228	1.41894	0.346731	-0.192374	-0.343179	-0.133841	-0.778956	-0.478836
10	AD	2.3761	2.58855	2.1214	1.75935	1.10194	1.3171	2.56153	1.21262	-0.712177	-0.425559	-0.9401	-0.809817	-0.217118
11	CTR	0.0730939	0.0546482	0.0598795	0.226389	0.147031	0.125939	0.116758	0.360632	1.25895	0.0835951	0.257957	-0.229756	0.355643
12	CTR	0.174602	0.0505269	0.282547	0.261649	0.264138	0.279778	0.13894	0.489585	2.02138	0.872471	1.09587	0.806839	0.171195
13	AD	1.34937	-0.0895809	0.0074059	0.747101	0.0773382	0.738137	-0.868009	0.557222	-0.495437	-0.688121	-0.807463	-0.906325	-1.3771
14	AD	0.23437	-0.405322	-0.313813	-0.746757	0.35509	0.530787	-0.427991	-0.0256255	1.29548	0.373808	0.530363	0.142056	-0.541873
15	AD	1.07968	0.595507	1.1889	-0.271776	1.70523	1.25791	1.6104	-0.0471543	-0.308725	-0.378789	-0.0394279	-0.307752	0.190957
16	AD	0.69381	1.88026	0.422081	2.3035	0.99444	1.26919	0.593493	1.56465	0.52198	-0.000332368	-0.234481	-1.31142	-0.799964
17	CTR	0.254295	-0.114506	0.367661	0.0663098	0.141699	0.213367	0.307209	0.225795	-0.517853	-1.05066	-0.882091	-0.842445	-1.45524
18	MCI	-0.0565419	-0.0152092	0.535131	-0.330452	0.375341	0.545773	-0.312618	0.228484	0.738837	0.496102	0.0169304	-0.0904476	-0.383216
19	MCI	-1.30178	-1.46811	-1.24139	-1.21565	-1.45014	-1.64368	-1.21708	-1.26349	0.299875	0.255848	0.479537	0.398698	0.617702
20	MCI	-0.846697	0.530184	0.0838373	-0.305814	0.86908	-0.0159555	-0.485843	0.322199	0.363281	-0.648238	-0.173836	-0.507165	-0.083799
21	MCI	1.06129	1.46791	0.692043	1.47541	-0.551841	0.41103	-0.406146	-0.161444	-1.99532	-1.42394	-1.33626	-1.67403	-1.49052
22	AD	-1.30979	-1.31553	-1.35309	-0.851517	-0.819662	-0.214626	-1.5258	-1.07303	1.0022	1.48044	1.53456	1.38505	1.52605
23	MCI	-0.485682	-0.622569	-0.68359	-0.312772	-0.750734	-0.436008	-0.841713	-0.690325	1.75007	1.7617	1.83581	2.47237	1.66197
24	AD	-0.51341	-1.22022	-0.070049	0.987763	-1.51201	-1.25922	-0.104442	0.452451	-1.29354	-2.47406	-2.46282	-1.83651	-1.59033
25	MCI	-1.5216	-1.8383	-1.55962	-1.48109	-1.70684	-1.84854	-1.14322	-1.76586	1.50498	1.19988	1.47177	1.88018	1.39104
26	CTR	-0.179234	-0.0718074	-0.212823	0.0175682	-0.304091	-0.345667	-0.204899	-0.277601	0.106798	0.654547	0.985093	1.3877	1.74836
27	CTR	0.779701	0.159086	0.860858	0.442077	0.885619	0.80221	0.779839	0.914577	-0.267325	0.218388	0.0803049	-0.324997	0.123571
28	CTR	0.345828	0.0513602	0.269763	0.172913	0.0918635	0.169432	0.237201	0.273042	-1.46119	-0.648177	-0.230925	-0.794999	-0.432168
29	AD	-1.80806	-1.14678	-1.62762	-1.13554	-1.35846	-1.706	-1.64675	-1.501	-1.42133	-1.01796	-1.06865	-0.782367	-0.803517
30	AD	-1.23805	1.19947	-0.673289	0.0823399	-0.638178	-1.19134	-0.982404	-0.907444	-0.450851	-0.434073	-0.208362	-0.0681	-0.410175
31	CTR	-0.384195	-0.410869	-0.466136	-0.25779	-0.295141	-0.295856	-0.387737	-0.291666	-0.471382	-0.489736	-0.263093	-0.345368	-0.420729
32	MCI	-0.859914	0.456353	-0.705565	-0.395574	-0.88946	-0.763245	-0.22614	-0.77774	0.392906	0.48159	0.486911	0.465304	0.419627
33	CTR	0.186431	-0.027294	0.168566	0.185429	0.0780299	0.102259	0.172813	0.199985	0.517645	-0.239803	-0.110727	-0.249489	0.521141
34	CTR	0.344881	-0.0236013	0.170182	0.164229	0.250498	0.322214	0.122377	0.504704	-0.910487	-1.37879	-1.08633	-0.801267	-1.33281
35	CTR	0.338425	0.52025	0.496265	0.304486	0.3225	0.341568	0.328569	0.369472	0.0315284	-0.067432	-0.237722	0.130999	0.385563
36	MCI	-0.630755	1.23136	0.599601	0.048497	1.89084	0.79997	0.272284	-0.378555	0.389888	1.88331	1.33638	1.71448	1.59504
37	CTR	-0.0234246	-0.200748	0.00978528	-0.163654	-0.17654	-0.125671	-0.0109831	-0.179789	-0.231639	0.116057	-0.122373	0.887306	1.24189
38	CTR	0.476624	0.366869	0.548513	0.155951	0.179882	0.240421	0.395405	0.243114	-1.43438	-0.147622	-0.675039	-0.477912	-0.408168
39	AD	1.11641	1.51868	3.68614	2.65353	2.51597	3.45986	1.92734	3.70951	-1.26355	-0.485621	-0.831467	-0.977825	-0.289217
40	CTR	-0.560772	0.116253	-0.529428	-0.382558	-0.65366	-0.610612	-0.242158	-0.85643	-0.757487	0.293773	0.221667	0.418697	-0.346839
41	MCI	-0.238782	-1.64905	-1.14086	-1.34384	-1.40798	-1.00083	-0.967887	-1.50434	1.8484	1.49596	1.22389	2.06887	1.90528
42	AD	0.521781	0.586862	1.22128	0.179511	1.65256	1.09531	0.905493	0.800683	-0.778259	-0.526575	-0.519438	-0.698428	0.246097
43	CTR	-0.183091	-0.350657	-0.333313	-0.176496	-0.169359	-0.162897	-0.230136	-0.15285	1.50753	1.04921	0.99786	0.518791	0.699323
44	CTR	-0.32572	-0.185297	-0.428047	0.181543	-0.367834	-0.326504	-0.291373	-0.130764	1.20366	1.55677	0.787906	0.68196	1.31328
45	CTR	-0.468093	-0.148345	-0.368502	0.0513734	-0.431448	-0.381394	-0.388361	-0.189296	-0.103382	0.309531	0.318166	0.317747	0.258279
46	CTR	0.0181006	0.0830234	0.0367483	0.238673	0.183532	0.1254	0.0157695	0.370077	1.32828	1.39302	1.38288	1.07439	0.820092
47	MCI	-0.166375	0.833109	0.602279	-0.217085	-0.268318	1.6144	0.332657	-0.750297	0.228025	0.103498	-0.0234945	-0.527567	0.341219
48	MCI	0.780945	-0.809049	-0.818777	-0.567324	-1.25507	-0.7195	-0.718981	-0.919719	-1.18654	-0.89437	-0.815284	-1.36486	-1.68725
49	AD	0.442978	0.384396	-0.264592	1.54901	0.340339	0.734731	1.91652	0.497455	0.675779	-0.0882141	0.346184	0.658458	0.167663
50	CTR	-0.279288	-0.506655	-0.378767	-0.624292	-0.401349	-0.415287	-0.205837	-0.596024	0.959977	1.32999	1.38165	1.66085	0.870092
51	AD	-0.980945	-0.147831	-0.812334	-0.467029	-0.0736932	-0.263272	-1.01134	-0.051047	-0.500083	-1.01682	-0.600695	-0.829673	-0.741015
52	MCI	-0.885483	-1.26329	-0.5201	-0.262452	-0.59038	-0.869952	-0.795239	-0.0393055	0.949954	0.790322	1.64358	0.632098	0.441158
53	CTR	-1.14584	-1.28749	-1.49924	-1.16347	-1.4007	-1.37682	-1.08612	-1.63159	0.0709529	-0.447099	-0.255716	-0.949225	-0.355823
54	MCI	-0.0729484	0.166075	-0.271422	0.114529	-0.233201	-0.487178	1.91991	-0.666607	0.690441	1.40164	1.27268	1.51111	1.9732
55	CTR	-0.370032	0.0624694	-0.493785	-0.262836	-0.604245	-0.506927	-0.365642	-0.632912	0.634718	-0.274587	-0.00272053	-0.146739	-0.694674
56	CTR	0.27831	0.83599	0.196417	0.211121	0.4128	0.100385	0.113169	-0.133914	-0.924485	-0.515288	-0.786655	0.035298	0.0200068
57	MCI	-0.820824	-1.221	-0.878086	-1.00742	-1.30666	-1.19271	-1.05796	-1.25827	0.356502	1.18234	0.980832	1.15073	1.47083
58	CTR	0.828439	0.436808	1.23567	0.657289	0.933696	0.932046	0.814584	1.01887	-1.20952	-0.675046	-0.925381	-0.861687	-1.20241
59	CTR	0.0404647	0.148395	-0.381011	-0.32656	0.70147	0.400111	-0.311961	-0.18811	-0.934483	0.0568374	0.0388108	-0.271531	-0.297029
60	CTR	-0.149499	-0.0188647	0.0575921	-0.21425	0.020462	-0.016306	-0.0431089	-0.121911	-1.48195	-0.656923	-0.291768	-0.319049	-0.271301
61	CTR	0.709869	2.04325	1.28381	1.12773	1.22853	1.09541	0.892859	1.09446	-0.417792	-0.915648	-0.797554	-0.399613	-0.865184
62	MCI	0.448913	0.160932	0.70425	1.42339	0.502518	0.550581	0.433397	1.60915	-1.81429	-1.72389	-1.42594	-0.90943	-1.67212
63	CTR	-0.787029	-0.525217	-1.07966	-0.662838	-1.06099	-1.01537	-0.794645	-1.21295	1.3622	0.479515	0.580806	0.808479	0.351486
64	MCI	-2.1512	-1.8592	-2.20943	-1.54992	-2.14103	-2.23211	-1.97063	-1.95899	0.643422	1.01398	1.13315	1.19881	0.214241
65	AD	0.910256	1.70207	2.17439	2.75353	1.38701	1.5618	1.67998	1.66252	-0.410857	0.408541	0.743083	0.428378	-0.270776
66	AD	-1.39298	-1.75616	-1.62649	-1.41589	-0.632257	-1.19706	-1.52054	-0.311957	0.580517	1.40939	1.58794	0.946142	0.88998
