# Supplementary material for: Amyloid and tau accumulate across distinct spatial networks and are differentially associated with brain connectivity
Source: eLife. 2019 Dec 9;8:e50830. doi: 10.7554/eLife.50830 (PMC6938400; doi:10.7554/eLife.50830)
Supplement: Figure 5—source data 1. — Values for the tau networks and mean diffusivity of white matter tracts that were significantly correlated with each other, after regressing out the effects of age, sex and presence of cognitive impairment. [file elife-50830-fig5-data1.xlsx]

## Sheet: Data_Fig3_Fig4
ID	Diagnosis	IC5_Tau_Superior_Frontal	IC6_Tau_Posterior_Medial	IC7_Tau_Fronto_Parietal	IC10_Tau_Right_Inferior_Occipital	IC11_Tau_Middle_Frontal	MD_Cingulum_Cingulate_Tract	MD_Cingulum_Hippocampal_Tract	MD_Inferior_Fronto_Occipital_Fasciculus	MD_Inferior_Longitudinal_Fasciculus	MD_Superior_Longitudinal_Temporal
1	AD	-0.747711	-0.0105358	0.598487	0.495913	-0.443879	-0.247509	0.0786247	-1.2822	-0.544848	0.0435913
2	AD	1.6452	1.42886	1.0132	1.74713	0.962661	0.0953926	1.29253	0.753654	1.59459	2.1707
3	AD	0.00753663	0.440229	0.639499	1.16401	0.565371	-0.668786	0.846551	0.229232	0.918047	0.524678
4	CTR	-0.494101	-0.0789278	-0.0569478	0.146064	-0.257975	-0.546796	-0.0186058	-0.861498	-1.15181	-0.322806
5	AD	-0.70039	0.764492	1.19321	0.63461	0.209651	0.953084	1.65112	1.42093	1.74733	1.75839
6	AD	-0.108718	-0.367424	-0.540092	-0.0568781	-0.404206	0.121555	-1.24081	-0.48261	-0.519365	-0.910267
7	AD	-1.19895	-0.489227	-1.38359	-1.28266	-0.50425	0.395611	0.45823	0.928308	0.434844	1.0199
8	AD	-0.0381665	-0.510153	-0.814301	-1.47487	-0.123967	0.0951947	0.258013	0.788505	0.538796	0.426337
9	MCI	-0.71764	2.33178	2.11228	1.41894	0.346731	-0.107479	0.352915	0.514788	0.575193	0.602434
10	AD	1.75935	1.10194	1.3171	2.56153	1.21262	1.17228	0.666547	1.08724	1.15914	0.327288
11	CTR	0.226389	0.147031	0.125939	0.116758	0.360632	0.405988	0.00138993	0.489547	0.458099	-0.291643
12	CTR	0.261649	0.264138	0.279778	0.13894	0.489585	-0.733739	-0.979644	-0.495687	-1.05045	-0.618209
13	AD	0.747101	0.0773382	0.738137	-0.868009	0.557222	-0.508796	-0.556724	-0.411842	0.097624	-0.55527
14	AD	-0.746757	0.35509	0.530787	-0.427991	-0.0256255	0.369168	0.142914	-0.076523	0.591376	0.39939
15	AD	-0.271776	1.70523	1.25791	1.6104	-0.0471543	-0.160677	-0.93633	0.344013	-0.561257	-0.0151077
16	AD	2.3035	0.99444	1.26919	0.593493	1.56465	-0.539468	-1.36485	-0.881679	-0.730362	-0.269948
17	CTR	0.0663098	0.141699	0.213367	0.307209	0.225795	0.465389	0.0176022	1.37567	1.04463	0.630605
18	MCI	-0.330452	0.375341	0.545773	-0.312618	0.228484	2.16873	-0.0747536	0.951412	0.837476	0.403228
19	MCI	-1.21565	-1.45014	-1.64368	-1.21708	-1.26349	-0.632108	-0.943191	-0.641313	-0.924767	-0.959756
20	MCI	-0.305814	0.86908	-0.0159555	-0.485843	0.322199	-0.594443	-0.642477	-1.07032	-0.814328	-0.196952
21	MCI	1.47541	-0.551841	0.41103	-0.406146	-0.161444	-0.809804	-0.27474	-0.699592	-1.21634	-1.11022
22	AD	-0.851517	-0.819662	-0.214626	-1.5258	-1.07303	-0.748147	-1.34109	-1.56658	-1.6804	-1.24788
23	MCI	-0.312772	-0.750734	-0.436008	-0.841713	-0.690325	-1.43965	0.070281	-0.722744	0.263412	-1.42273
24	AD	0.987763	-1.51201	-1.25922	-0.104442	0.452451	4.53885	3.56864	3.9879	3.70988	4.56212
25	MCI	-1.48109	-1.70684	-1.84854	-1.14322	-1.76586	-1.3951	-1.67721	-1.64277	-1.79608	-1.60561
26	CTR	0.0175682	-0.304091	-0.345667	-0.204899	-0.277601	-0.580233	-0.791107	-0.95336	-0.726868	-0.841015
27	CTR	0.442077	0.885619	0.80221	0.779839	0.914577	0.144224	1.696	0.616537	0.469898	1.39275
28	CTR	0.172913	0.0918635	0.169432	0.237201	0.273042	0.713199	-0.235252	0.542263	-0.00762768	0.20181
29	AD	-1.13554	-1.35846	-1.706	-1.64675	-1.501	0.717961	0.217029	0.154957	0.119712	-0.582593
30	AD	0.0823399	-0.638178	-1.19134	-0.982404	-0.907444	0.319408	0.4684	1.04997	0.880844	0.757331
31	CTR	-0.25779	-0.295141	-0.295856	-0.387737	-0.291666	-0.271556	0.280052	-0.0366526	-0.266194	0.0976735
32	MCI	-0.395574	-0.88946	-0.763245	-0.22614	-0.77774	-0.153009	0.218064	0.163843	0.153156	0.284794
33	CTR	0.185429	0.0780299	0.102259	0.172813	0.199985	-0.992656	-1.16821	-0.617809	-0.863822	-0.366995
34	CTR	0.164229	0.250498	0.322214	0.122377	0.504704	1.25316	1.06067	1.99574	2.04426	1.85167
35	CTR	0.304486	0.3225	0.341568	0.328569	0.369472	0.0606334	0.0550621	0.033743	-0.200114	0.180893
36	MCI	0.048497	1.89084	0.79997	0.272284	-0.378555	-0.488244	-0.103667	-0.498372	0.101201	-0.820781
37	CTR	-0.163654	-0.17654	-0.125671	-0.0109831	-0.179789	-0.249425	1.03963	0.339173	0.015936	-0.49014
38	CTR	0.155951	0.179882	0.240421	0.395405	0.243114	2.02256	0.772625	0.374533	0.3866	0.101278
39	AD	2.65353	2.51597	3.45986	1.92734	3.70951	0.462285	0.200788	0.101593	-0.238928	0.772124
40	CTR	-0.382558	-0.65366	-0.610612	-0.242158	-0.85643	0.162604	0.410112	-0.3425	0.38535	0.00272429
41	MCI	-1.34384	-1.40798	-1.00083	-0.967887	-1.50434	-1.6258	-1.37067	-1.82987	-2.04852	-0.891046
42	AD	0.179511	1.65256	1.09531	0.905493	0.800683	-0.0766923	0.501069	-0.0164664	0.366071	0.240158
43	CTR	-0.176496	-0.169359	-0.162897	-0.230136	-0.15285	-0.990007	-0.925741	-0.315609	-0.157857	-0.31256
44	CTR	0.181543	-0.367834	-0.326504	-0.291373	-0.130764	-0.416408	-0.486623	-1.20028	-0.435117	0.462022
45	CTR	0.0513734	-0.431448	-0.381394	-0.388361	-0.189296	-0.440991	0.592634	-0.306815	-0.403774	-0.22013
46	CTR	0.238673	0.183532	0.1254	0.0157695	0.370077	-0.622126	-1.20794	-0.875299	-1.05402	-0.425907
47	MCI	-0.217085	-0.268318	1.6144	0.332657	-0.750297	-0.865849	-0.602744	-0.502067	-0.534299	-0.399501
48	MCI	-0.567324	-1.25507	-0.7195	-0.718981	-0.919719	0.504969	-0.101611	0.0699719	0.391111	0.347757
49	AD	1.54901	0.340339	0.734731	1.91652	0.497455	0.52149	1.24694	0.988133	0.403943	-0.0182868
50	CTR	-0.624292	-0.401349	-0.415287	-0.205837	-0.596024	0.175883	-0.47395	0.224392	0.686799	-0.682443
51	AD	-0.467029	-0.0736932	-0.263272	-1.01134	-0.051047	-0.739492	-0.175265	0.827744	0.0248317	0.598547
52	MCI	-0.262452	-0.59038	-0.869952	-0.795239	-0.0393055	-0.697203	-1.6154	-0.609415	-0.614063	-1.02383
53	CTR	-1.16347	-1.4007	-1.37682	-1.08612	-1.63159	-0.990204	-0.630434	-1.3543	-0.764514	-0.331285
54	MCI	0.114529	-0.233201	-0.487178	1.91991	-0.666607	-0.301893	-0.149457	-0.630742	-0.455646	-1.37574
55	CTR	-0.262836	-0.604245	-0.506927	-0.365642	-0.632912	-0.783104	-0.857697	-0.722112	-0.862971	-0.756688
56	CTR	0.211121	0.4128	0.100385	0.113169	-0.133914	-0.501858	-0.787568	-0.277111	-0.299821	-0.123436
57	MCI	-1.00742	-1.30666	-1.19271	-1.05796	-1.25827	-0.882962	-0.347387	-0.498604	-0.538501	-0.685269
58	CTR	0.657289	0.933696	0.932046	0.814584	1.01887	0.619094	0.0232117	0.190993	0.268156	0.12323
59	CTR	-0.32656	0.70147	0.400111	-0.311961	-0.18811	0.61633	0.817393	0.583094	0.430333	0.449208
60	CTR	-0.21425	0.020462	-0.016306	-0.0431089	-0.121911	1.10527	1.45169	1.51159	1.68415	0.367449
61	CTR	1.12773	1.22853	1.09541	0.892859	1.09446	0.509735	0.189724	0.102918	0.324722	0.167867
62	MCI	1.42339	0.502518	0.550581	0.433397	1.60915	1.80627	2.45586	1.03981	0.622051	1.31179
63	CTR	-0.662838	-1.06099	-1.01537	-0.794645	-1.21295	-0.134965	0.154971	-0.0211664	0.0460288	-0.245922
64	MCI	-1.54992	-2.14103	-2.23211	-1.97063	-1.95899	-0.818854	-1.23911	-1.27883	-1.48286	-1.55051
65	AD	2.75353	1.38701	1.5618	1.67998	1.66252	0.94925	0.825751	0.847109	0.594511	-0.164257
66	AD	-1.41589	-0.632257	-1.19706	-1.52054	-0.311957	-0.689536	-0.762767	-0.90656	-1.42456	-0.745004
